# Supplementary material for: The role of nanocerianite (CeO2) in the stability of Ce carbonates at low-hydrothermal conditions
Source: Royal Society of Chemistry journal article supplement (doi:10.1039/d3ra00519d), 2023-01-01
Supplement: d3ra00519d1.pdf [file d3ra00519d1.pdf]

## Supplementary information

### **The role of nanocerianite (CeO<sub>2</sub>) in the stability of Ce carbonates at low-hydrothermal conditions.**

**Adrienn Maria Szucs<sup>a</sup>, Melanie Maddin <sup>a</sup>, Daniel Brien <sup>a</sup>, Remi Rateau <sup>a</sup> and Juan Diego Rodriguez-Blanco<sup>b</sup>**

<sup>a</sup> Department of Geology, School of Natural Sciences, Trinity College Dublin, Ireland.

<sup>b</sup> iCRAG, Department of Geology, School of Natural Sciences, Trinity College Dublin, Ireland.

Table SI-1. Summary of comparative results on a selection of previous and present literatures on REE carbonates and cerianite characterisation and synthesis methods, highlighting the novelty of this study.

| Publication                  | Experimental approach                | Focus                                                                                                                                                              | Produced Materials                                                                                                                                                                                                                               | Major Impact                                                                                                                                                                                                                         |
|------------------------------|--------------------------------------|--------------------------------------------------------------------------------------------------------------------------------------------------------------------|--------------------------------------------------------------------------------------------------------------------------------------------------------------------------------------------------------------------------------------------------|--------------------------------------------------------------------------------------------------------------------------------------------------------------------------------------------------------------------------------------|
| This study                   | Solution and replacement experiments | Ce-bearing solution interaction with carbonate ions studied via solution experiments and replacement experiments. An investigation of the crystallisation pathway. | amorphous Ce carbonate; Ce-lanthanite; Ce-kozoite; Ce-hydroxylbastnasite; Cerianite                                                                                                                                                              | <ul style="list-style-type: none"> <li>– Understanding the formation of cerianite in natural deposits at low-hydrothermal conditions.</li> <li>– Ce-carbonates and cerianite synthesis with various morphologies and size</li> </ul> |
| Szucs et al., 2022 [1]       | Replacement experiments              | Dolomite or aragonite seed interaction with La, Pr, Nd, or Dy- bearing solutions                                                                                   | La-lanthanite; La-kozoite, La-hydroxylbastnasite; Pr-lanthanite; Pr-kozoite; Pr-hydroxylbastnasite; Nd-lanthanite; Nd, kozoite; Nd-hydroxylbastnasite; Dy-tengerite; Dy-kozoite                                                                  | <ul style="list-style-type: none"> <li>– Understanding the formation of bastnasite in natural deposits and the influence of carbonate mineral involved at low-hydrothermal conditions.</li> </ul>                                    |
| Szucs et al., 2021 [2]       | Replacement experiments              | Calcite seed interaction with La, Nd or Dy-bearing solutions                                                                                                       | La-lanthanite; La-kozoite; La-hydroxylbastnasite; Nd-lanthanite; Nd-kozoite; Nd-hydroxylbastnasite; Dy-kozoite                                                                                                                                   | <ul style="list-style-type: none"> <li>– Revealed the formation of bastnasite in natural deposits and the effect of temperature and ionic radii of the REE in question at low-hydrothermal conditions.</li> </ul>                    |
| Janoš et al., 2017 [3]       | Solution experiment                  | Investigating cerianite's ability to breakdown biologically relevant organophosphates                                                                              | Nanocrystalline cerianite                                                                                                                                                                                                                        | <ul style="list-style-type: none"> <li>– Cerianite's unusual phosphatase-mimetic ability was demonstrated</li> </ul>                                                                                                                 |
| Voigt et al., 2016 [4]       | Solution experiments                 | Investigation of hydroxylbastnasite solubility in aqueous solutions at 25 °C                                                                                       | Nd- and La-hydroxylbastnasite; Nd-kozoite                                                                                                                                                                                                        | <ul style="list-style-type: none"> <li>– solubility products (<math>K_{SP}</math>) of Nd- and La-hydroxylbastnasite and Nd-kozoite were defined</li> </ul>                                                                           |
| Vallina et al., 2015 [5]     | Solution experiments                 | The role of amorphous precursors in the formation of La and Nd carbonates                                                                                          | Amorphous La-lanthanum carbonate; La-dioxy carbonate; La-oxide; La-lanthanite; La-kozoite; La-hydroxylbastnasite; Amorphous Nd-lanthanum carbonate; Nd-dioxy carbonate; Nd-oxide; Nd-lanthanite; Nd-tengerite; Nd-kozoite; Nd-hydroxylbastnasite | <ul style="list-style-type: none"> <li>– Fabrication of targeted La and Nd carbonate synthesis.</li> </ul>                                                                                                                           |
| Ravishankar et al., 2015 [6] | Solution combustion method           | Investigating cerianite for photocatalytic and antibacterial activity                                                                                              | Cerianite                                                                                                                                                                                                                                        | <ul style="list-style-type: none"> <li>– Particle characterisation and revealed photocatalytic and antibacterial activity</li> </ul>                                                                                                 |

|                                   |                                                                             |                                                                                                             |                                                                                                                                                                                                                                                                                                                                                                                                                                                                                                                                        |                                                                                                                                                                                           |
|-----------------------------------|-----------------------------------------------------------------------------|-------------------------------------------------------------------------------------------------------------|----------------------------------------------------------------------------------------------------------------------------------------------------------------------------------------------------------------------------------------------------------------------------------------------------------------------------------------------------------------------------------------------------------------------------------------------------------------------------------------------------------------------------------------|-------------------------------------------------------------------------------------------------------------------------------------------------------------------------------------------|
| Vallina et al., 2014 [7]          | Solution experiments                                                        | Effect of heat on the formation of hexagonal $\text{NdCO}_3\text{OH}$                                       | Amorphous Nd- hydroxycarbonate; Nd-hydroxycarbonate                                                                                                                                                                                                                                                                                                                                                                                                                                                                                    | – Amorphous Nd- hydroxycarbonate and Nd-hydroxycarbonate fabrication with different sizes and morphologies by temperature control.                                                        |
| Rodriguez-Blanco et al., 2014 [8] | Solution experiments                                                        | Investigating the role of La, Ce, Pr and Nd ions in the crystallisation of lanthanites                      | La, Ce, Pr, Nd amorphous carbonate precursor; La, Ce, Pr, Nd-lanthanite                                                                                                                                                                                                                                                                                                                                                                                                                                                                | – The differences in ionic potential and in dehydration energy of the La, Ce, Pr and Nd ions control the kinetics of the lanthanite formation.                                            |
| Vallina et al., 2013 [9]          | Solution experiments                                                        | Dy carbonate characterisation                                                                               | Amorphous Dy carbonate; Dy-kozoite                                                                                                                                                                                                                                                                                                                                                                                                                                                                                                     | – Amorphous Dy carbonate and Dy-kozoite fabrication with different sizes and morphologies by temperature control.                                                                         |
| Suresh et al. 2013[10]            | Solution experiment                                                         | Investigating optical and electrical properties of nano cerianite formed from solution at room temperature. | Nano cerianite                                                                                                                                                                                                                                                                                                                                                                                                                                                                                                                         | – Determined the activation energy of their material.                                                                                                                                     |
| Zhang et al., 2009 [12]           | Sol-gel method                                                              | Method development for quantum-size cerianite synthesis                                                     | Cerianite                                                                                                                                                                                                                                                                                                                                                                                                                                                                                                                              | – A sol-gel method for nano-size cerianite synthesis                                                                                                                                      |
| Sathyamurthy et al., 2005 [13]    | Reverse micellar synthesis                                                  | Method development for cerianite synthesis                                                                  | Cerianite nano particles                                                                                                                                                                                                                                                                                                                                                                                                                                                                                                               | – Cerianite reverse micellar synthesis was demonstrated.                                                                                                                                  |
| Özer 2001 [14]                    | Sol-gel method                                                              | Investigating the optical properties and electrochromic of sol-gel deposited ceria film                     | Ceria ( $\text{CeO}_2$ ) films                                                                                                                                                                                                                                                                                                                                                                                                                                                                                                         | – Determined optical properties of sol-gel spin coated ceria films.                                                                                                                       |
| Chai and Mroczkowski 1978 [15]    | Hydrothermal method using rare earth carbonate hydrate as starting material | Y, La, Gd and Er carbonate formation at temperature range 250-500 °C and 1 to 2 kb conditions.              | Y, La, Gd and Er carbonate                                                                                                                                                                                                                                                                                                                                                                                                                                                                                                             | – Ionic radii of the Y, La, Gd and Er ions influence the thermal stability of the rare earth carbonate. Crystal morphology is controlled by temperature, solution chemistry, ionic radii. |
| Kozo et al., 1973[16]             | Solution experiments                                                        | Investigation of rare earth carbonates' crystal parameters                                                  | The materials were labelled the following way: lanthanite-type $\text{Ln}_2(\text{CO}_3)_3 \cdot 8\text{H}_2\text{O}$ ( $\text{Ln}=\text{La, Ce}$ ), tengeritetype $\text{Ln}_2(\text{CO}_3)_3 \cdot n\text{H}_2\text{O}$ ( $\text{Ln}=\text{Nd, Sm, Gd, Dy, Ho, Er, and Y}$ , $n=2-3$ ), monoxocarbonate-type $\text{Ln}_2\text{O}(\text{CO}_3)_2 \cdot n\text{H}_2\text{O}$ ( $\text{Ln}=\text{La, Ce, Nd, and Sm}$ , $n=1-2$ ) and a hydrated double carbonate of rare earth and sodium (rare earth= La, Ce, Nd, Sm, Gd, Dy, and Y) | – Defined crystal parameters by X-ray diffraction                                                                                                                                         |
| Graham 1955 [17]                  | The discovery of Cerianite                                                  | The first characterisation of cerianite                                                                     | Cerianite                                                                                                                                                                                                                                                                                                                                                                                                                                                                                                                              | Cerianite was characterized the first time.                                                                                                                                               |

Table SI-2. Details of FTIR stretching ( $\nu$ ) and bending ( $\delta$ )-vibrational band assignments and corresponding references for the water and carbonate species in the poorly-ordered hydrated Ce carbonate, with band numbers corresponding to those shown in the spectra in Figure 1b.

| Band Number | Mode of vibration             | Bibliography |
|-------------|-------------------------------|--------------|
| 1           | $\nu$ (O-H)                   | [18]         |
| 2           | $\delta$ (O-H)                | [19,20]      |
| 3           | $\nu_3$ asym. CO <sub>3</sub> | [21]         |
| 4           | $\nu_3$ asym. CO <sub>3</sub> | [22]         |
| 5           | $\nu_1$ sym. CO <sub>3</sub>  | [23,24]      |
| 6           | $\nu_2$ asym. CO <sub>3</sub> | [24]         |
| 7           | $\nu_4$ asym. CO <sub>3</sub> | [24,25]      |
| 8           | $\nu_4$ CO <sub>3</sub>       | [23,24]      |

Table SI-3. Unit cell parameters of the original calcite, dolomite, aragonite, and the Ce-bearing carbonate minerals and cerianite crystallised in the experiments.

| Mineral               | Space group  | Solution Experiments                                                                         | Replacement experiments                                                                    |                                                                                             |                                                                                             |
|-----------------------|--------------|----------------------------------------------------------------------------------------------|--------------------------------------------------------------------------------------------|---------------------------------------------------------------------------------------------|---------------------------------------------------------------------------------------------|
|                       |              |                                                                                              | Calcite                                                                                    | Dolomite                                                                                    | Aragonite                                                                                   |
| Calcite               | $R\bar{3}c$  | –                                                                                            | a = b = 4.989(17) Å<br>c = 17.062(55) Å<br>vol = 367.78(28) Å <sup>3</sup>                 | –                                                                                           | –                                                                                           |
| Dolomite              | $R\bar{3}$   | –                                                                                            | –                                                                                          | a = b = 4.8028(13) Å<br>c = 15.9998(43) Å<br>vol = 319.62(20) Å <sup>3</sup>                | –                                                                                           |
| Aragonite             | Pmnc         | –                                                                                            | –                                                                                          | –                                                                                           | a = 4.9608(13) Å<br>b = 7.9663(20) Å<br>c = 5.7421(15) Å<br>vol = 229.92(10) Å <sup>3</sup> |
| Ce-lanthanite         | Pbnb         | a = 9.498(11) Å<br>b = 16.945(20) Å<br>c = 8.925(11) Å<br>vol = 1436.4(30) Å <sup>3</sup>    | –                                                                                          | –                                                                                           | a = 9.5083 Å<br>b = 16.9563 Å<br>c = 8.92280 Å<br>vol = 1438.5949 Å <sup>3</sup>            |
| Ce-kozoite            | Pnma         | a = 7.3199(15) Å<br>b = 5.0090(10) Å<br>c = 8.55702(18) Å<br>vol = 313.50(11) Å <sup>3</sup> | a = 7.3144(18) Å<br>b = 5.000(12) Å<br>c = 8.5457(20) Å<br>vol = 312.55(13) Å <sup>3</sup> | a = 7.3176(14) Å<br>b = 5.0044(95) Å<br>c = 8.5490(16) Å<br>vol = 312.28(50) Å <sup>3</sup> | a = 7.3192(57) Å<br>b = 5.0103(37) Å<br>c = 8.5697(56) Å<br>vol = 314.26(39) Å <sup>3</sup> |
| Ce-hydroxylbastnasite | $P\bar{6}$   | –                                                                                            | a = b = 12.3396(30) Å<br>c = 9.9035(27) Å<br>vol = 1305.94(73) Å <sup>3</sup>              | a = b = 12.5301(24) Å<br>c = 9.9732(10) Å<br>vol = 1356.05(58) Å <sup>3</sup>               | a = b = 12.5371(54) Å<br>c = 9.96187(72) Å<br>vol = 1356.01(15) Å <sup>3</sup>              |
| Cerianite             | $Fm\bar{3}m$ | a = b = c = 5.4200(11) Å<br>vol = 159.216(97) Å <sup>3</sup>                                 | a = b = c = 5.4150(16) Å<br>vol = 158.78(14) Å <sup>3</sup>                                | a = b = c = 5.4147(27) Å<br>vol = 158.749(24) Å <sup>3</sup>                                | a = b = c = 5.4133(69) Å<br>vol = 158.64(30) Å <sup>3</sup>                                 |

Table SI-4. pH and saturation indices for Ce-lanthanite and cerianite calculated with PHREEQC in the early stages of the replacement reactions, when calcite/dolomite/aragonite are equilibrated with 50 mM Ce(NO<sub>3</sub>)<sub>3</sub>-bearing aqueous solutions.

| Temperature | Calcite |                      | Dolomite |                      | Aragonite |                      |
|-------------|---------|----------------------|----------|----------------------|-----------|----------------------|
|             | pH      | Phases: SI           | pH       | Phases: SI           | pH        | Phases: SI           |
| 50 °C       | 6.68    | Ce-lanthanite: 9.93  | 6.55     | Ce-lanthanite: 9.33  | 6.74      | Ce-lanthanite: 10.12 |
|             |         | Cerianite: 15.88     |          | Cerianite: 15.59     |           | Cerianite: 15.99     |
| 90 °C       | 5.95    | Ce-lanthanite: 8.56  | 5.81     | Ce-lanthanite: 7.72  | 5.99      | Ce-lanthanite: 8.81  |
|             |         | Cerianite: 14.02     |          | Cerianite: 13.71     |           | Cerianite: 14.11     |
| 165 °C      | 5.2     | Ce-lanthanite: 2.93  | 5        | Ce-lanthanite: 2.01  | 5.27      | Ce-lanthanite: 3.17  |
|             |         | Cerianite: 11.28     |          | Cerianite: 10.94     |           | Cerianite: 11.36     |
| 201 °C      | 5.01    | Ce-lanthanite: -0.56 | 4.84     | Ce-lanthanite: -1.40 | 5.13      | Ce-lanthanite: -0.35 |
|             |         | Cerianite: 10.18     |          | Cerianite: 9.88      |           | Cerianite: 10.26     |

Table SI-5. pH and saturation indices for Ce-lanthanite and cerianite calculated with PHREEQC in the early stages of the solution experiments after mixing 50mM Na<sub>2</sub>CO<sub>3</sub> and 50mM Ce(NO<sub>3</sub>)<sub>3</sub> aqueous solutions.

| Temperature | pH   | Phases: SI           |
|-------------|------|----------------------|
| 35 °C       | 7.47 | Ce-lanthanite: 11.29 |
|             |      | Cerianite: 17.41     |
| 50 °C       | 7.21 | Ce-lanthanite: 11.28 |
|             |      | Cerianite: 16.80     |
| 80 °C       | 6.67 | Ce-lanthanite: 11.03 |
|             |      | Cerianite: 15.41     |

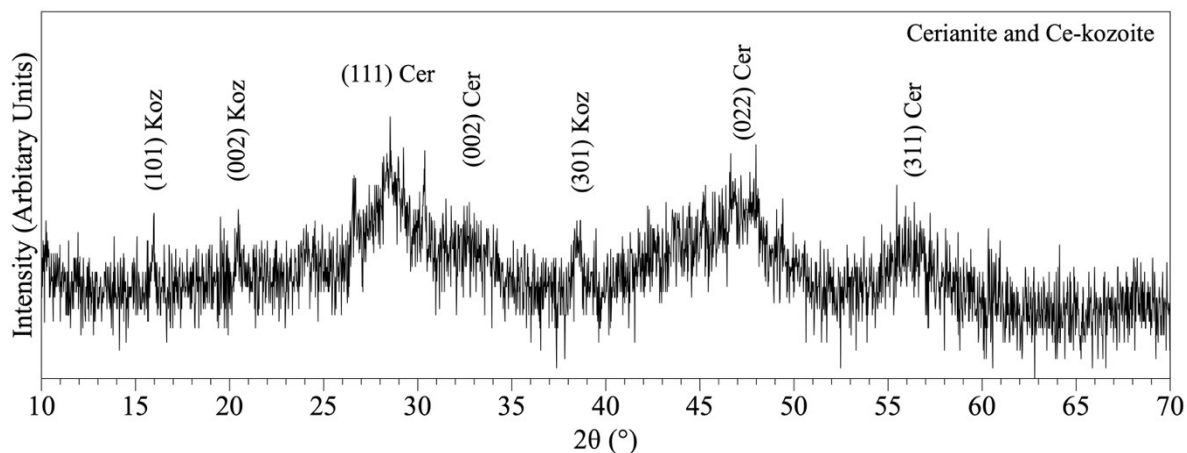

Figure SI-1. XRD pattern of nano-crystalline cerianite and Ce-kozoite formed after 3 hours in the solution experiments after mixing 10ml of 15mM  $\text{Ce}(\text{NO}_3)_3$  and 10ml of 20 mM  $\text{Na}_2\text{CO}_3$  pre-heated at 80 °C.

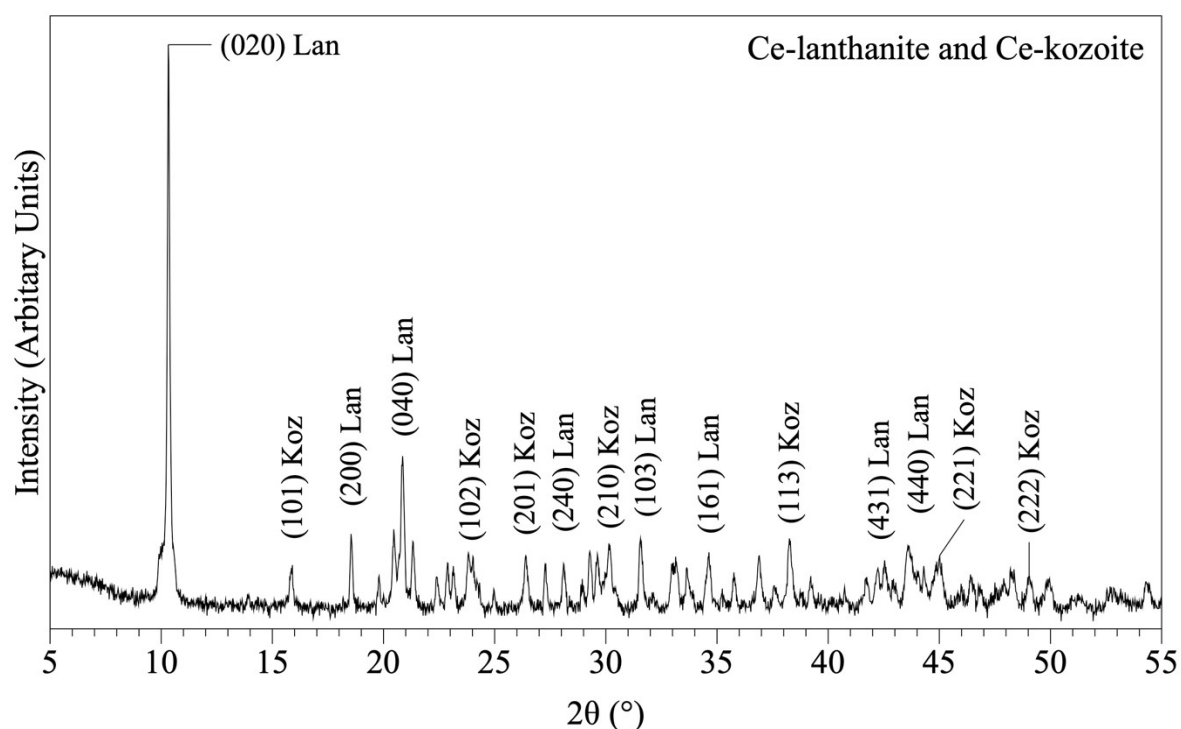

Figure SI-2. XRD pattern of cerianite and Ce-kozoite formed after 1 day of reaction in the solution experiments after mixing 10ml of 50mM  $\text{Ce}(\text{NO}_3)_3$  and 10ml of 50 mM  $\text{Na}_2\text{CO}_3$  pre-heated at 35 °C.

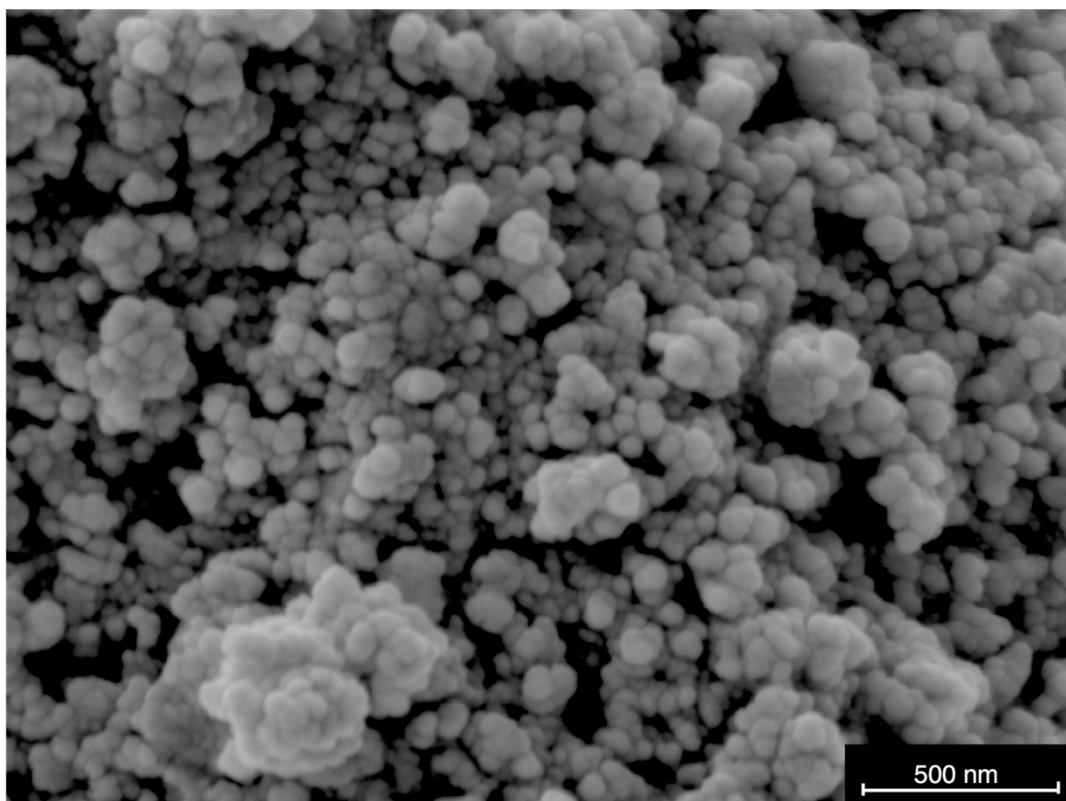

Figure SI-3. SEM image of nano-crystalline cerianite formed after 3 hours in the solution experiments after mixing 10ml of 15mM  $\text{Ce}(\text{NO}_3)_3$  and 10ml of 20 mM  $\text{Na}_2\text{CO}_3$  pre-heated at 80 °C.

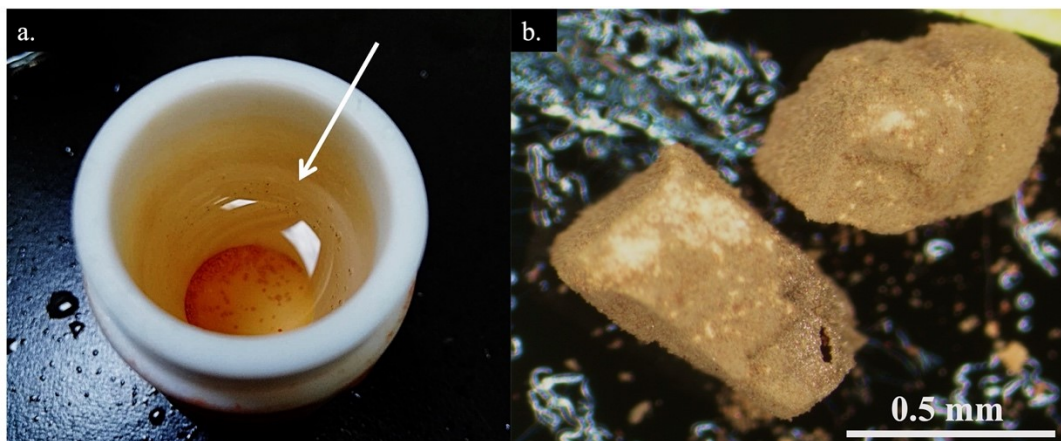

Figure-SI-4. a) image of gas bubbles seen on the side of the Teflon reactor when sampling the experiment that contained dolomite reacted for 3 days at 165 °C and b) a closer image of the dry material.



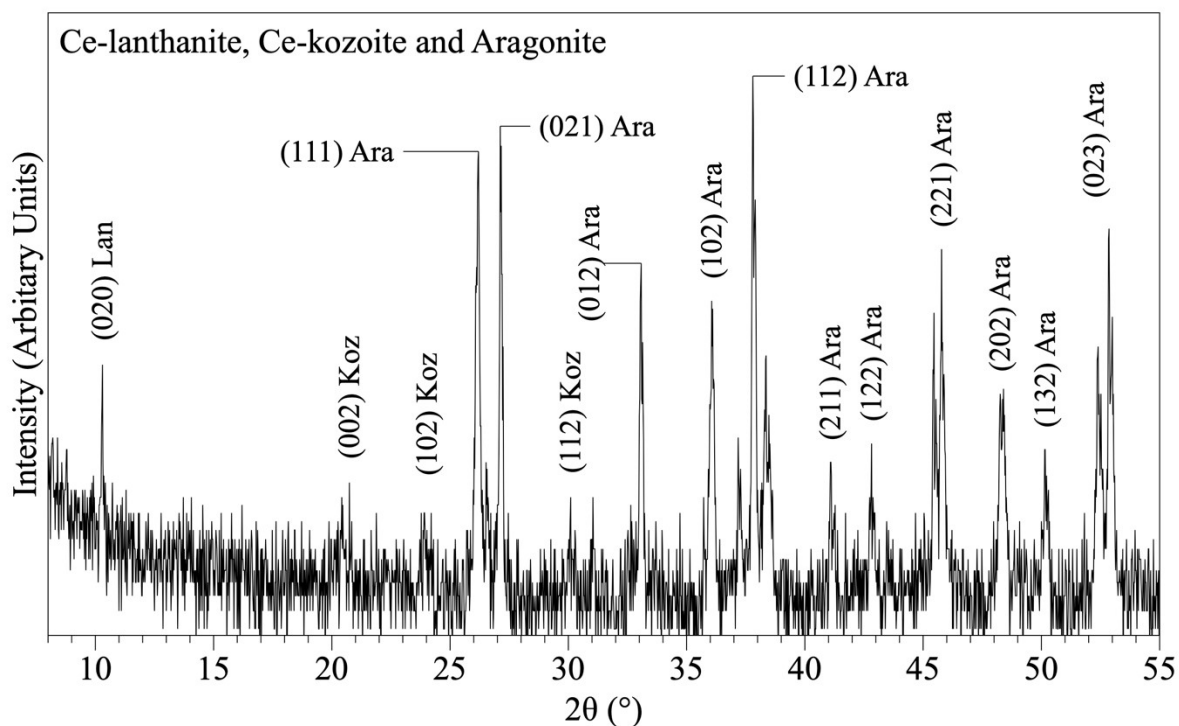

Figure SI-5. XRD pattern of sample obtained in the aragonite replacement experiment at 50 °C after 1 day of reaction, showing the formation of Ce-lanthanite and Ce-kozoite.

### Supplementary Information References

- [1] A.M. Szucs, M. Maddin, D. Brien, P.C. Guyett, J.D. Rodriguez-Blanco, Targeted Crystallization of Rare Earth Carbonate Polymorphs at Hydrothermal Conditions via Mineral Replacement Reactions, *Glob. Challenges*. n/a (2022) 2200085. <https://doi.org/https://doi.org/10.1002/gch2.202200085>.
- [2] A.M. Szucs, A. Stavropoulou, C. O'Donnell, S. Davis, J.D. Rodriguez-Blanco, Reaction Pathways toward the Formation of Bastnäsite: Replacement of Calcite by Rare Earth Carbonates, *Cryst. Growth Des.* 21 (2021). <https://doi.org/10.1021/acs.cgd.0c01313>.
- [3] P. Janoš, J. Henych, J. Pfeifer, N. Zemanová, V. Pilařová, D. Milde, T. Opletal, J. Tolasz, M. Malý, V. Štengl, Nanocrystalline cerium oxide prepared from a carbonate precursor and its ability to breakdown biologically relevant organophosphates, *Environ. Sci. Nano.* 4 (2017). <https://doi.org/10.1039/c7en00119c>.
- [4] M. Voigt, J.D. Rodriguez-Blanco, B. Vallina, L.G. Benning, E.H. Oelkers, An experimental study of hydroxylbastnasite solubility in aqueous solutions at 25°C, *Chem. Geol.* 430 (2016) 70–77. <https://doi.org/https://doi.org/10.1016/j.chemgeo.2016.03.012>.
- [5] B. Vallina, J.D. Rodriguez-Blanco, A.P. Brown, J.A. Blanco, L.G. Benning, The role of amorphous precursors in the crystallization of La and Nd carbonates, *Nanoscale.* 7 (2015) 12166–12179. <https://doi.org/10.1039/C5NR01497B>.
- [6] T.N. Ravishankar, T. Ramakrishnappa, G. Nagaraju, H. Rajanaika, Synthesis and Characterization of CeO<sub>2</sub> Nanoparticles via Solution Combustion Method for Photocatalytic and Antibacterial Activity Studies., *ChemistryOpen.* 4 (2015) 146–154. <https://doi.org/10.1002/open.201402046>.
- [7] B. Vallina, J.D. Rodriguez-Blanco, J.A. Blanco, L.G. Benning, The effect of heating

- on the morphology of crystalline neodymium hydroxycarbonate,  $\text{NdCO}_3\text{OH}$ , *Mineral. Mag.* 78 (2014) 1391–1397. <https://doi.org/DOI: 10.1180/minmag.2014.078.6.05>.
- [8] J.D. Rodriguez-Blanco, B. Vallina, J.A. Blanco, L.G. Benning, The role of REE<sup>3+</sup> in the crystallization of lanthanites, *Mineral. Mag.* 78 (2014) 1373–1380. <https://doi.org/DOI: 10.1180/minmag.2014.078.6.03>.
- [9] B. Vallina, J. Rodriguez-Blanco, A. Brown, J. Blanco, L. Benning, Amorphous dysprosium carbonate: Characterization, stability, and crystallization pathways, *J. Nanoparticle Res.* 15 (2013) 1438–1450. <https://doi.org/10.1007/s11051-013-1438-3>.
- [10] R. Suresh, V. Ponnuswamy, R. Mariappan, Effect of annealing temperature on the microstructural, optical and electrical properties of  $\text{CeO}_2$  nanoparticles by chemical precipitation method, *Appl. Surf. Sci.* 273 (2013) 457–464. <https://doi.org/https://doi.org/10.1016/j.apsusc.2013.02.062>.
- [11] T. Roncal-Herrero, J.D. Rodríguez-Blanco, E.H. Oelkers, L.G. Benning, The direct precipitation of rhabdophane ( $\text{REEPO}_4 \cdot n\text{H}_2\text{O}$ ) nano-rods from acidic aqueous solutions at 5–100 °C, *J. Nanoparticle Res.* 13 (2011) 4049–4062. <https://doi.org/10.1007/s11051-011-0347-6>.
- [12] Q.-C. Zhang, Z.-H. Yu, G. Li, Q.-M. Ye, J.-H. Lin, Synthesis of quantum-size cerium oxide nanocrystallites by a novel homogeneous precipitation method, *J. Alloys Compd.* 477 (2009) 81–84. <https://doi.org/https://doi.org/10.1016/j.jallcom.2008.10.059>.
- [13] S. Sathyamurthy, K.J. Leonard, R.T. Dabestani, M.P. Paranthaman, Reverse micellar synthesis of cerium oxide nanoparticles, *Nanotechnology.* 16 (2005). <https://doi.org/10.1088/0957-4484/16/9/089>.
- [14] N. Özer, Optical properties and electrochromic characterization of sol–gel deposited ceria films, *Sol. Energy Mater. Sol. Cells.* 68 (2001) 391–400. [https://doi.org/https://doi.org/10.1016/S0927-0248\(00\)00371-8](https://doi.org/https://doi.org/10.1016/S0927-0248(00)00371-8).
- [15] B.H.T. Chai, S. Mroczkowski, Synthesis of rare-earth carbonates under hydrothermal conditions, *J. Cryst. Growth.* 44 (1978) 84–97. [https://doi.org/https://doi.org/10.1016/0022-0248\(78\)90331-7](https://doi.org/https://doi.org/10.1016/0022-0248(78)90331-7).
- [16] K. Nagashima, H. Wakita, A. Mochizuki, The Synthesis of Crystalline Rare Earth Carbonates, *Bull. Chem. Soc. Jpn.* 46 (1973) 152–156. <https://doi.org/10.1246/bcsj.46.152>.
- [17] A.R. Graham, Cerianite  $\text{CeO}_2$ : A new rare-earth oxide mineral, *Am. Mineral.* 40 (1955) 560–564.
- [18] G.H. Cartledge, Studies on the periodic system II. The ionic potential and related properties 1, *J. Am. Chem. Soc.* 50 (1928) 2863–2872. <https://doi.org/10.1021/ja01398a002>.
- [19] H. Gamsjäger, Solubility equilibria: From chemical potentiometry to industrial applications, *Pure Appl. Chem.* 67 (1995) 535–542.
- [20] H. Niu, Q. Min, Z. Tao, J. Song, C. Mao, S. Zhang, Q. Chen, One-pot facile synthesis and optical properties of porous  $\text{La}_2\text{O}_2\text{CO}_3$  hollow microspheres, *J. Alloys Compd.* 509 (2011) 744–747.
- [21] B. Bakiz, F. Guinneton, M. Arab, A. Benlhachemi, J.-R. Gavarria, Elaboration, characterization of  $\text{LaOHCO}_3$ ,  $\text{La}_2\text{O}_2\text{CO}_3$  and  $\text{La}_2\text{O}_3$  phases and their gas solid interactions with  $\text{CH}_4$  and  $\text{CO}$  gases, *Moroccan J. Condens. Matter.* 12 (2010).
- [22] M.J. Norman, J.E. Andrew, T.H. Bett, R.K. Clifford, J.E. England, N.W. Hopps, K.W. Parker, K. Porter, M. Stevenson, Multipass reconfiguration of the HELEN Nd: glass laser at the Atomic Weapons Establishment, *Appl. Opt.* 41 (2002) 3497–3505.
- [23] D.J. Tobler, S. Shaw, L.G. Benning, Quantification of initial steps of nucleation and growth of silica nanoparticles: An in-situ SAXS and DLS study, *Geochim. Cosmochim. Acta.* 73 (2009) 5377–5393.

- [24] A. V Radha, T.Z. Forbes, C.E. Killian, P. Gilbert, A. Navrotsky, Transformation and crystallization energetics of synthetic and biogenic amorphous calcium carbonate, *Proc. Natl. Acad. Sci.* 107 (2010) 16438–16443.
- [25] G.P. Hatch, Dynamics in the global market for rare earths, *Elements.* 8 (2012) 341–346.
